# Supplementary material
Source: PubMed Central journal article supplement (PMC3005377)
Supplement: NIHMS255694-supplement-Supplementary_Data.pdf [file NIHMS255694-supplement-Supplementary_Data.pdf]

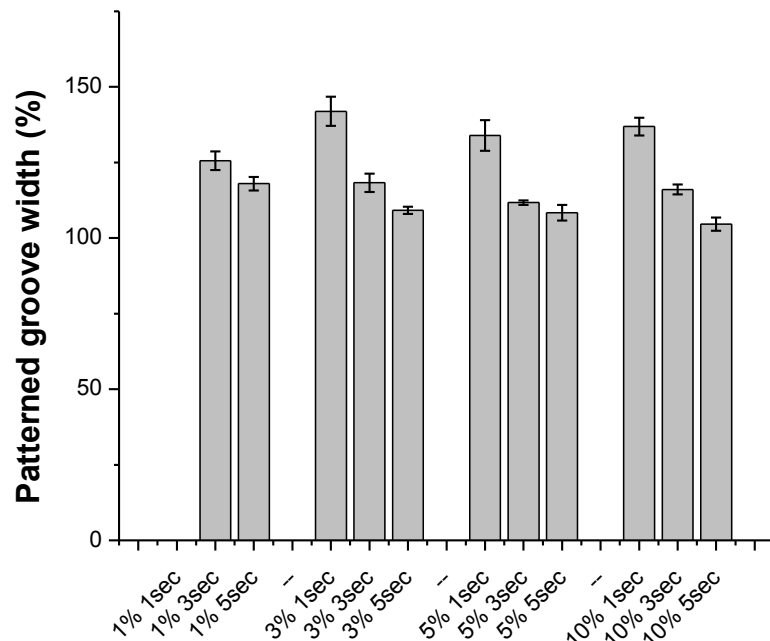

**Figure S1.** Patterned groove width with different UV exposure time and photoinitiator with 1, 3, 5, 10% concentration. Higher initial photoinitiator concentration requires shorter exposure time for patterning. The first condition (PI concentration: 1%, exposure time: 1 sec) was not measurable due to the under-crosslinked structure. Photomask width = 320  $\mu\text{m}$ , spacer thickness = 150  $\mu\text{m}$  (one coverslip) with constant UV intensity (7.5  $\text{mW}/\text{cm}^2$ ).
